# Supplementary material for: Morphological and Phylogenetic Analyses Reveal Three New Species of Phyllosticta (Botryosphaeriales, Phyllostictaceae) in China
Source: MDPI journal article supplement (doi:10.3390/jof10010007), 2023-12-22
Supplement: s1 [file s1]

**Table S1.** Species and GenBank accession numbers of DNA sequences used in this study.

| Species                                   | Voucher2                   | Host/Substrate              | Country      | GenBank accession number |           |          |          |          |
|-------------------------------------------|----------------------------|-----------------------------|--------------|--------------------------|-----------|----------|----------|----------|
|                                           |                            |                             |              | ITS                      | LSU       | tefl     | ACT      | gapdh    |
| Phyllosticta capitalensis species complex |                            |                             |              |                          |           |          |          |          |
| P. acaciigena                             | CPC 28295 <sup>†</sup>     | Acacia suaveolens           | Australia    | KY173433                 | KY173523  | NA       | KY173570 | NA       |
| P. aloecicola                             | CPC 21020 <sup>†</sup>     | Aloe ferox                  | South Africa | KF154280                 | KF206214  | KF289193 | KF289311 | KF289124 |
|                                           | CPC 21021                  | Aloe ferox                  | South Africa | KF154281                 | KF206213  | KF289194 | KF289312 | KF289125 |
| P. ardisiicola                            | NBRC 102261 <sup>†</sup>   | Ardisia crenata             | Japan        | AB454274                 | NA        | NA       | AB704216 | NA       |
| P.aristolochiicola                        | BRIP 53316 <sup>†</sup>    | Aristolochia acuminata      | Australia    | JX486129                 | NA        | NA       | NA       | NA       |
| P. azevinhi                               | MUCC0088                   | Ilex pedunculosa            | Japan        | AB454302                 | NA        | NA       | AB704226 | NA       |
| P. beaumarisii                            | CBS 535.87                 | Muehlenbekia adpressa       | Australia    | NR_145235                | NG_058040 | KF766429 | KF306232 | KF289074 |
| P. brazilianiae                           | LGMF 330 <sup>†</sup>      | Mangifera indica            | Brazil       | JF343572                 | KF206217  | JF343593 | JF343656 | JF343758 |
|                                           | LGMF 334                   | Mangifera indica            | Brazil       | JF343566                 | KF206215  | JF343587 | JF343650 | JF343752 |
| P. capitalensis                           | CBS 114751                 | Vaccinium sp.               | New Zealand  | EU167584                 | EU167584  | FJ538407 | FJ538465 | KF289088 |
|                                           | CBS 128856 <sup>†</sup>    | Stanhopea sp.               | Brazil       | JF261465                 | KF206304  | JF261507 | JF343647 | JF343776 |
| P. carochlae                              | CGMCC3.17317 <sup>†</sup>  | Caryota ochlandra           | China        | KJ847422                 | NA        | KF289178 | KF289273 | KF289092 |
| P. cavendishii                            | BRIP 57384                 | Musa cv. Lady finger        | Australia    | KC117644                 | KU697330  | KF009695 | KF014059 | KU716085 |
|                                           | BRIP 57383                 | Musa cv. Lady finger        | Australia    | KC117643                 | KU697329  | KF009694 | KF014058 | KU716084 |
| P.cordylinophila                          | MFLUCC10-0166 <sup>†</sup> | Cordyline fruticosa         | Thailand     | KF170287                 | KF206242  | KF289172 | KF289295 | KF289076 |
|                                           | MFLUCC 12-0014             | Cordyline fruticosa         | Thailand     | KF170288                 | KF206228  | KF289171 | KF289301 | KF289075 |
| P. doitungensis                           | MFLU 21-0175 <sup>†</sup>  | Dasymaschalon obtusipetalum | Thailand     | OK661033                 | OK661034  | OL345581 | NA       | NA       |
| P. eugeniae                               | CBS 445.82 <sup>†</sup>    | Eugenia aromatica           | Indonesia    | AY042926                 | KF206288  | KF289208 | KF289246 | KF289139 |
| P. fallopiiae                             | MUCC0113 <sup>†</sup>      | Fallopia japonica           | Japan        | AB454307                 | NA        | NA       | AB704228 | NA       |
| P.guangdongensis                          | CFCC 58144 <sup>†</sup>    | Viburnum odoratissimum      | China        | OQ202160                 | OQ202170  | OQ267758 | OQ267764 | OQ267770 |

|                             |                             |                                         |              |          |          |          |          |          |
|-----------------------------|-----------------------------|-----------------------------------------|--------------|----------|----------|----------|----------|----------|
|                             | CFCC 58766                  | <i>Viburnum odoratissimum</i>           | China        | OQ202161 | OQ202171 | OQ267759 | OQ267765 | OQ267771 |
|                             | CFCC 58772                  | <i>Viburnum odoratissimum</i>           | China        | OQ202162 | OQ202172 | OQ267760 | OQ267766 | OQ267772 |
| <i>P. ilicis-aquifolii</i>  | CGMCC 3.14358 <sup>T</sup>  | <i>Ilex aquifolium</i>                  | China        | JN692538 | NA       | JN692526 | JN692514 | NA       |
|                             | CGMCC 3.14359               | <i>Ilex aquifolium</i>                  | China        | JN692539 | NA       | JN692527 | JN692515 | NA       |
| <i>P. maculata</i>          | CPC 18347 <sup>T</sup>      | <i>Musa</i> cv. <i>Golygoly pot-pot</i> | Australia    | JQ743570 | NA       | KF009700 | KF014016 | NA       |
|                             | BRIP 46622                  | <i>Musa</i> cv. <i>Golygoly pot-pot</i> | Australia    | JQ743567 | NA       | KF009692 | KF014013 | NA       |
| <i>P. mangiferae</i>        | IMI 260576 <sup>T</sup>     | <i>Mangifera indica</i>                 | India        | JF261459 | KF206222 | JF261501 | JF343641 | JF343748 |
| <i>P. mangifera-indicae</i> | MFLUCC 10-0029 <sup>T</sup> | <i>Mangifera indica</i>                 | Thailand     | KF170305 | KF206240 | KF289190 | KF289296 | KF289121 |
| <i>P. musaechinensis</i>    | GZAAS 6.1247                | <i>Musa</i> sp.                         | China        | KF955294 | NA       | KM816639 | KM816627 | KM816633 |
|                             | GZAAS 6.1384                | <i>Musa</i> sp.                         | China        | KF955295 | NA       | KM816640 | KM816628 | KM816634 |
| <i>P. musarum</i>           | BRIP 57803                  | <i>Musa</i> sp.                         | Malaysia     | JX997138 | NA       | KF009737 | KF014055 | NA       |
|                             | BRIP 58028                  | <i>Musa</i> sp.                         | Australia    | KC988377 | NA       | KF009738 | KF014054 | NA       |
| <i>P. oblongifoliae</i>     | SAUCC210055                 | <i>Garcinia oblongifolia</i>            | China        | OM248442 | OM232085 | OM273890 | OM273894 | OM273898 |
|                             | SAUCC210052 <sup>T</sup>    | <i>Garcinia oblongifolia</i>            | China        | OM248445 | OM232088 | OM273893 | OM273897 | OM273901 |
| <i>P. paracapitalensis</i>  | CPC 26517 <sup>T</sup>      | <i>Citrus floridana</i>                 | Italy        | KY855622 | KY855796 | KY855951 | KY855677 | KY855735 |
|                             | CPC 26518                   | <i>Citrus floridana</i>                 | Italy        | KY855623 | KY855797 | KY855952 | KY855678 | KY855736 |
| <i>P. parthenocissi</i>     | CBS 111645 <sup>T</sup>     | <i>Parthenocissus quinquefolia</i>      | USA          | EU683672 | NA       | JN692530 | JN692518 | NA       |
| <i>P. partricuspidatae</i>  | NBRC 9466 <sup>T</sup>      | <i>Parthenocissus tricuspidata</i>      | Japan        | KJ847424 | NA       | KJ847446 | KJ847432 | KJ847440 |
|                             | NBRC 9757                   | <i>Parthenocissus tricuspidata</i>      | Japan        | KJ847425 | NA       | KJ847447 | KJ847433 | KJ847441 |
| <i>P. philoprina</i>        | CBS 587.69                  | <i>Ilex aquifolium</i>                  | Spain        | KF154278 | KF206297 | KF289206 | KF289250 | KF289137 |
| <i>P. phoenicis</i>         | CBS 147091                  | <i>Phoenix reclinata</i>                | South Africa | MW883442 | MW883833 | MW890098 | MW890031 | MW890050 |
| <i>P. pterospermi</i>       | SAUCC210104 <sup>T</sup>    | <i>Pterospermum heterophyllum</i>       | China        | OM249954 | OM249956 | OM273902 | OM273904 | OM273906 |

|                                                        |                             |                                     |          |          |          |          |          |          |
|--------------------------------------------------------|-----------------------------|-------------------------------------|----------|----------|----------|----------|----------|----------|
|                                                        | SAUCC210106                 | <i>Pterospermumheterophyllum</i>    | China    | OM249955 | OM249957 | OM273903 | OM273905 | OM273907 |
| <i>P. rhizophorae</i>                                  | NCYUCC 19-0352 <sup>T</sup> | <i>Rhizophora stylosa</i>           | China    | MT360030 | MT360039 | NA       | MT363248 | MT363250 |
|                                                        | NCYUCC 19-0358              | <i>Rhizophora stylosa</i>           | China    | MT360031 | MT360040 | NA       | MT363249 | MT363251 |
| <i>P. saprophytica</i>                                 | SAUCC 1516-2                | <i>the plant saprophytic leaves</i> | China    | OR551459 | OR686933 | OR621091 | OR621084 | OR704557 |
|                                                        | SAUCC 1516-5                | <i>the plant saprophytic leaves</i> | China    | OR551460 | OR686934 | OR621093 | OR621085 | OR704558 |
| <i>P. schimae</i>                                      | CGMCC 3.14354 <sup>T</sup>  | <i>Schima superba</i>               | China    | JN692534 | NA       | JN692522 | JN692510 | JN692506 |
| <i>P. schimicola</i>                                   | CGMCC 3.17319 <sup>T</sup>  | <i>Schima superba</i>               | China    | KJ847426 | NA       | KJ847448 | KJ847434 | KJ854895 |
|                                                        | CGMCC 3.17320               | <i>Schima superba</i>               | China    | KJ847427 | NA       | KJ847449 | KJ847435 | KJ854896 |
| <i>P. styracicola</i>                                  | CGMCC3.14985 <sup>T</sup>   | <i>Styrax grandiflorus</i>          | China    | JX025040 | NA       | JX025045 | JX025035 | JX025030 |
|                                                        | CGMCC3.14989                | <i>Styrax grandiflorus</i>          | China    | JX025041 | NA       | JX025046 | JX025036 | JX025031 |
| <i>P. vitis-rotundifoliae</i>                          | CGMCC 3.17322 <sup>T</sup>  | <i>Vitis rotundifolia</i>           | USA      | KJ847428 | NA       | KJ847450 | KJ847436 | KJ847442 |
|                                                        | CGMCC 3.17321               | <i>Vitis rotundifolia</i>           | USA      | KJ847429 | NA       | KJ847451 | KJ847437 | KJ847443 |
| <b><i>Phyllosticta concentrica</i> species complex</b> |                             |                                     |          |          |          |          |          |          |
| <i>P. anhuiensis</i>                                   | CFCC 54840 <sup>T</sup>     | <i>Quercus aliena</i>               | China    | OQ202157 | OQ202167 | OQ267761 | OQ267767 | OQ267773 |
|                                                        | CFCC 55887                  | <i>Quercus aliena</i>               | China    | OQ202158 | OQ202168 | OQ267762 | OQ267768 | OQ267774 |
|                                                        | CFCC 58849                  | <i>Quercus aliena</i>               | China    | OQ202159 | OQ202169 | OQ267763 | OQ267769 | OQ267775 |
| <i>P. aspidistricola</i>                               | NBRC 102244 <sup>T</sup>    | <i>Aspidistra elatior</i>           | Japan    | AB454314 | NA       | NA       | AB704204 | NA       |
| <i>P. aucubae-japonicae</i>                            | MAFF 236703 <sup>T</sup>    | <i>Aucuba japonica</i>              | Japan    | KR233300 | NA       | KR233310 | KR233305 | NA       |
| <i>P. bifrenariae</i>                                  | CBS 128855 <sup>T</sup>     | <i>Bifrenaria harrisoniae</i>       | Brazil   | JF343565 | KF206209 | JF343586 | JF343649 | JF343744 |
|                                                        | CPC 17467                   | <i>Bifrenaria harrisoniae</i>       | Brazil   | KF170299 | KF206260 | KF289207 | KF289283 | KF289138 |
| <i>P. catimbauensis</i>                                | URM 7672 <sup>T</sup>       | <i>Mandevilla catimbauensis</i>     | Brazil   | MF466160 | MF466163 | MF466155 | MF466157 | NA       |
|                                                        | URM 7674                    | <i>Mandevilla catimbauensis</i>     | Brazil   | MF466161 | MF466164 | MF466153 | MF466158 | NA       |
| <i>P. citriasiana</i>                                  | CBS 120486 <sup>T</sup>     | <i>Citrus maxima</i>                | Thailand | FJ538360 | KF206314 | FJ538418 | FJ538476 | JF343686 |

|                            |                             |                                |              |          |          |          |          |          |
|----------------------------|-----------------------------|--------------------------------|--------------|----------|----------|----------|----------|----------|
| <i>P. citriasiana</i>      | CBS 120487                  | <i>Citrus maxima</i>           | China        | FJ538361 | KF206313 | FJ538419 | FJ538477 | JF343687 |
| <i>P.citribraziliensis</i> | CBS 100098 <sup>T</sup>     | <i>Citrus limon</i>            | Brazil       | FJ538352 | KF206221 | FJ538410 | FJ538468 | JF343691 |
| <i>P. citricarpa</i>       | CBS 127454 <sup>T</sup>     | <i>Citrus limon</i>            | Australia    | JF343583 | KF206306 | JF343604 | JF343667 | JF343771 |
| <i>P. citrichinensis</i>   | ZJUCC 200956 <sup>T</sup>   | <i>Citrus reticulata</i>       | China        | JN791620 | NA       | JN791459 | JN791533 | NA       |
|                            | ZJUCC 2010150               | <i>Citrus maxima</i>           | China        | JN791662 | NA       | JN791514 | JN791582 | NA       |
| <i>P. citrimaxima</i>      | MFLUCC 10-0137 <sup>T</sup> | <i>Citrus maxima</i>           | Thailand     | KF170304 | KF206229 | KF289222 | KF289300 | KF289157 |
| <i>P. concentrica</i>      | CBS 937.70                  | <i>Hedera helix</i>            | Italy        | FJ538350 | KF206291 | FJ538408 | KF289257 | JF411745 |
|                            | CPC 18842 <sup>T</sup>      | <i>Hedera</i> sp.              | Italy        | KF170310 | KF206256 | KF289228 | KF289288 | KF289163 |
| <i>P. cussonia</i>         | CPC 14873 <sup>T</sup>      | <i>Cussonia</i> sp.            | South Africa | JF343578 | KF206279 | JF343599 | JF343662 | JF343764 |
|                            | CPC 14875                   | <i>Cussonia</i> sp.            | South Africa | JF343579 | KF206278 | JF343600 | JF343663 | JF343765 |
| <i>P. elongata</i>         | CBS 126.22 <sup>T</sup>     | <i>Oxycoccus macrocarpos</i>   | USA          | FJ538353 | NA       | FJ538411 | FJ538469 | KF289164 |
| <i>P. ericarum</i>         | CBS 132534 <sup>T</sup>     | <i>Erica gracilis</i>          | South Africa | KF206170 | KF206253 | KF289227 | KF289291 | KF289162 |
| <i>P. fujianensis</i>      | SAUCC 1366-3 <sup>T</sup>   | <i>Lonicera japonica</i>       | China        | OR551457 | OR686935 | OR621090 | OR621086 | OR704555 |
|                            | SAUCC 1366-5                | <i>Lonicera japonica</i>       | China        | OR551458 | OR686936 | OR621091 | OR621087 | OR704556 |
| <i>P. gardeniicola</i>     | MUCC0117                    | <i>Gardenia jasminoides</i>    | Japan        | AB454310 | NA       | NA       | AB704230 | NA       |
|                            | MUCC0089                    | <i>Gardenia jasminoides</i>    | Japan        | AB454303 | NA       | NA       | NA       | NA       |
| <i>P. gwangjuensis</i>     | CNUFC NJ1-12 <sup>T</sup>   | <i>Torreya nucifera</i>        | Korea        | OK285195 | NA       | OM038511 | OM001471 | NA       |
|                            | CNUFC NJ1-12-1              | <i>Torreya nucifera</i>        | Korea        | OK285196 | NA       | OM038512 | OM001472 | NA       |
| <i>P. hostae</i>           | CGMCC 3.14355 <sup>T</sup>  | <i>Hosta plantaginea</i>       | China        | JN692535 | NA       | JN692523 | JN692511 | JN692503 |
|                            | CGMCC 3.14356               | <i>Hosta plantaginea</i>       | China        | JN692536 | NA       | JN692524 | JN692512 | JN692504 |
| <i>P.hymenocallidicola</i> | CBS 131309 T                | <i>Hymenocallis littoralis</i> | Australia    | JQ044423 | JQ044443 | KF289211 | KF289242 | KF289142 |
|                            | CPC 19331                   | <i>Hymenocallis littoralis</i> | Australia    | KF170303 | KF206254 | KF289212 | KF289290 | KF289143 |
| <i>P. hypoglossi</i>       | CBS 101.72                  | <i>Ruscus aculeatus</i>        | Italy        | FJ538365 | KF206326 | FJ538423 | FJ538481 | JF343694 |
|                            | CBS 434.92 <sup>T</sup>     | <i>Ruscus aculeatus</i>        | Italy        | FJ538367 | KF206299 | FJ538425 | FJ538483 | JF343695 |
| <i>P. iridigena</i>        | CBS 143410 <sup>T</sup>     | <i>Iris</i> sp.                | South Africa | MG934459 | NA       | MG934502 | MG934466 | NA       |

|                                                    |                          |                                                        |                |          |          |          |          |          |
|----------------------------------------------------|--------------------------|--------------------------------------------------------|----------------|----------|----------|----------|----------|----------|
| <i>P. kerriae</i>                                  | MAFF 240047 <sup>†</sup> | <i>Kerria japonica</i>                                 | Japan          | AB454266 | NA       | NA       | NA       | NA       |
| <i>P. kobus</i>                                    | MUCC0049                 | <i>Magnolia kobus</i>                                  | Japan          | AB454286 | NA       | NA       | AB704221 | NA       |
| <i>P. ophiopogonis</i>                             | KACC 47754               | <i>Ophiopogon japonicus</i>                            | South Korea    | KP197057 | NA       | NA       | NA       | NA       |
|                                                    | LrLF11                   | <i>Lycoris radiata</i>                                 | China          | MG543713 | NA       | NA       | NA       | NA       |
| <i>P. paracitricarpa</i>                           | CPC 27169 <sup>†</sup>   | <i>Citrus limon</i>                                    | Greece         | KY855635 | KY855809 | KY855964 | KY855690 | KY855748 |
|                                                    | ZJUCC 200933             | <i>Citrus sinensis</i>                                 | China          | JN791626 | KY855813 | JN791468 | JN791544 | KY855752 |
| <i>P. pilospora</i>                                | MUCC 2912a <sup>†</sup>  | <i>Chamaecyparis pisifera</i><br>var. <i>plumose</i>   | Japan          | LC542597 | LC543423 | LC543445 | LC543465 | NA       |
| <i>P. speewahensis</i>                             | BRIP 58044 <sup>†</sup>  | Orchids                                                | Australia      | KF017269 | NA       | KF017268 | NA       | NA       |
| <i>P. spinarum</i>                                 | CBS 292.90               | <i>Chamaecyparis pisifera</i>                          | France         | JF343585 | KF206301 | JF343606 | JF343669 | JF343773 |
| <i>P. turpiniae</i>                                | SAUCC2864-3              | <i>Turpinia arguta</i>                                 | China          | OR551461 | OR686931 | OR621088 | OR704559 | OR704553 |
|                                                    | SAUCC2864-5              | <i>Turpinia arguta</i>                                 | China          | OR551462 | OR686932 | OR621089 | OR704560 | OR704554 |
| <i>P. westeae</i>                                  | BRIP 72390c <sup>†</sup> | <i>Clerodendrum inerme</i>                             | Australia      | OP599631 | NA       | OP627090 | NA       | NA       |
| <b><i>Phyllosticta cruenta</i> species complex</b> |                          |                                                        |                |          |          |          |          |          |
| <i>P. abieticola</i>                               | CBS 112067               | <i>Abies concolor</i>                                  | Canada         | KF170306 | EU754193 | NA       | KF289238 | NA       |
| <i>P. cornicola</i>                                | CBS 111639               | <i>Cornus florida</i>                                  | USA            | KF170307 | NA       | NA       | KF289234 | NA       |
| <i>P. cruenta</i>                                  | CBS 858.71               | <i>Polygonatum odoratum</i>                            | Czech Republic | KF170307 | NA       | MG934501 | MG934465 | MG934474 |
| <i>P. cruenta</i>                                  | MUCC0206                 | <i>Polygonatum odoratum</i><br>var. <i>pluriflorum</i> | Japan          | AB454331 | NA       | NA       | AB704237 | NA       |
| <i>P. cryptomeriae</i>                             | KACC 48643               | <i>Juniperus chinensis</i> var.<br><i>sargentii</i>    | Not given      | MK396559 | NA       | NA       | NA       | NA       |
|                                                    | MUCC0028                 | <i>Cryptomeria japonica</i>                            | Japan          | AB454271 | NA       | NA       | AB704213 | NA       |
| <i>P. foliorum</i>                                 | CBS 447.68 <sup>†</sup>  | <i>Taxus baccata</i>                                   | Netherlands    | KF170309 | KF206287 | KF289201 | KF289247 | KF289132 |
| <i>P. gaultheriae</i>                              | CBS 447.70 <sup>†</sup>  | <i>Gaultheria humifusa</i>                             | USA            | JN692543 | KF206298 | JN692531 | KF289248 | JN692508 |
| <i>P. hakeicola</i>                                | CBS 143492 <sup>†</sup>  | <i>Hakea</i> sp.                                       | Australia      | MH107907 | MH107953 | MH108025 | MH107984 | MH107999 |

|                                                     |                            |                                           |              |          |          |          |          |          |
|-----------------------------------------------------|----------------------------|-------------------------------------------|--------------|----------|----------|----------|----------|----------|
| <i>P. hamamelidis</i>                               | MUCC149                    | <i>Hamamelis japonica</i>                 | Japan        | KF170289 | NA       | NA       | KF289309 | NA       |
| <i>P. hubeiensis</i>                                | CGMCC 3.14986 <sup>T</sup> | <i>Viburnum odoratissimum</i>             | China        | JX025037 | NA       | JX025042 | JX025032 | JX025027 |
|                                                     | CGMCC 3.14987              | <i>Viburnum odoratissimum</i>             | China        | JX025038 | NA       | JX025043 | JX025033 | JX025028 |
| <i>P. illicii</i>                                   | 24-1-1 <sup>T</sup>        | <i>Illicium verum</i>                     | China        | MF198235 | MF198240 | MF198237 | MF198243 | NA       |
|                                                     | 16-16-1                    | <i>Illicium verum</i>                     | China        | MF198234 | MF198239 | MF198236 | MF198242 | NA       |
| <i>P. leucothoicola</i>                             | MUCC553 <sup>T</sup>       | <i>Leucothoe catesbaei</i>                | Japan        | AB454370 | AB454370 | NA       | KF289310 | NA       |
| <i>P. ligustricola</i>                              | MUCC0024 <sup>T</sup>      | <i>Ligustrum obtusifolium</i>             | Japan        | AB454269 | NA       | NA       | AB704212 | NA       |
| <i>P. minima</i>                                    | CBS 585.84 <sup>T</sup>    | <i>Acer rubrum</i>                        | USA          | KF206176 | KF206286 | KF289204 | KF289249 | KF289135 |
| <i>P. neopyrolae</i>                                | CPC 21879 <sup>T</sup>     | <i>Pyrola asarifolia</i>                  | Japan        | AB454318 | AB454318 | NA       | AB704233 | NA       |
| <i>P. pachysandricola</i>                           | MUCC124 <sup>T</sup>       | <i>Pachysandra terminalis</i>             | Japan        | AB454317 | AB454317 | NA       | AB704232 | NA       |
| <i>P. paxistimae</i>                                | CBS 112527 <sup>T</sup>    | <i>Paxistima mysinites</i>                | USA          | KF206172 | KF206320 | KF289209 | KF289239 | KF289140 |
| <i>P. podocarpicola</i>                             | CBS 728.79 <sup>T</sup>    | <i>Podocarpus maki</i>                    | USA          | KF206173 | KF206295 | KF289203 | KF289252 | KF289134 |
| <i>P. pyrolae</i>                                   | IFO 32652                  | <i>Erica carnea</i>                       | Not given    | AB041242 | NA       | NA       | NA       | NA       |
| <i>P. rubella</i>                                   | CBS 111635 <sup>T</sup>    | <i>Acer rubrum</i>                        | USA          | KF206171 | EU754194 | KF289198 | KF289233 | KF289129 |
| <i>P. sphaeropoidea</i>                             | CBS 756.70                 | <i>Aesculus hippocastanum</i>             | Germany      | AY042934 | KF206294 | KF289202 | KF289253 | KF289133 |
| <i>P. telopeae</i>                                  | CBS 777.97 <sup>T</sup>    | <i>Telopea speciosissima</i>              | Tasmania     | KF206205 | KF206285 | KF289210 | KF289255 | KF289141 |
| <i>P. yuccae</i>                                    | CBS 112065                 | <i>Yucca elephantipes</i>                 | USA          | KF206175 | NA       | NA       | KF289237 | NA       |
|                                                     | CBS 117136                 | <i>Yucca elephantipes</i>                 | New Zealand  | JN692541 | KF766385 | JN692529 | JN692517 | JN692507 |
| <b><i>Phyllosticta owaniana</i> species complex</b> |                            |                                           |              |          |          |          |          |          |
| <i>P. austroafricana</i>                            | CBS 144593 <sup>T</sup>    | leaf spots of unidentified deciduous tree | South Africa | MK442613 | MK442549 | MK442704 | MK442640 | NA       |
| <i>P. carissicola</i>                               | CPC 25665 <sup>T</sup>     | <i>Carissa macrocarpa</i>                 | South Africa | KT950849 | KT950863 | KT950879 | KT950872 | KT950876 |
| <i>P. hagahagaensis</i>                             | CBS 144592 <sup>T</sup>    | <i>Carissa bispinosa</i>                  | South Africa | MK442614 | MK442550 | MK442705 | MK442641 | MK442657 |
| <i>P. owaniana</i>                                  | CBS 776.97 <sup>T</sup>    | <i>Brabejum stellatifolium</i>            | South Africa | FJ538368 | KF206293 | FJ538426 | KF289254 | JF343767 |
|                                                     | CPC 14901                  | <i>Brabejum stellatifolium</i>            | South Africa | JF261462 | KF206303 | JF261504 | KF289243 | JF343766 |

|                                                     |                         |                                                   |              |          |          |          |          |          |
|-----------------------------------------------------|-------------------------|---------------------------------------------------|--------------|----------|----------|----------|----------|----------|
| <i>P. podocarp</i>                                  | CBS 111646              | <i>Podocarpus falcatus</i>                        | South Africa | AF312013 | KF206323 | KC357671 | KC357670 | KF289169 |
|                                                     | CBS 111647              | <i>Podocarpus lanceolata</i>                      | South Africa | KF154276 | KF206322 | KF289232 | KF289235 | KF289168 |
| <i>P. pseudotsugae</i>                              | CBS 111649              | <i>Pseudotsuga menziesii</i>                      | USA          | KF154277 | KF206321 | KF289231 | KF289236 | KF289167 |
| <b><i>Phyllosticta rhodora</i> species complex</b>  |                         |                                                   |              |          |          |          |          |          |
| <i>P. mimusopisicola</i>                            | CBS 138899 <sup>†</sup> | <i>Mimusops zeyheri</i>                           | South Africa | KP004447 | MH878626 | NA       | NA       | NA       |
| <i>P. rhodora</i>                                   | CBS 901.69              | <i>Rhododendron</i> sp.                           | Netherlands  | KF206174 | KF206292 | KF289230 | KF289256 | KF289166 |
| <b><i>Phyllosticta vaccinii</i> species complex</b> |                         |                                                   |              |          |          |          |          |          |
| <i>P. vaccinii</i>                                  | ATCC 46255 <sup>†</sup> | <i>Vaccinium macrocarpon</i>                      | China        | KC193585 | NA       | KC193582 | KC193580 | KC193583 |
|                                                     | LC 2795                 | <i>Vitis macrocarpon</i>                          | USA          | KR233323 | NA       | NA       | NA       | NA       |
| <i>P. vacciniicola</i>                              | CPC 18590 <sup>†</sup>  | <i>Vaccinium macrocarpum</i>                      | USA          | KF170312 | KF206257 | KF289229 | KF289287 | KF289165 |
| <b>Outgroup</b>                                     |                         |                                                   |              |          |          |          |          |          |
| <i>B. obtusa</i>                                    | CMW 8232 <sup>†</sup>   | Conifers                                          | South Africa | AY972105 | NA       | DQ280419 | AY972111 | NA       |
| <i>B. stevensii</i>                                 | CBS 112553 <sup>†</sup> | culture from isotype of<br><i>Diplodia mutila</i> | Not given    | AY259093 | AY928049 | AY573219 | NA       | NA       |
